# Supplementary material
Source: PubMed Central journal article supplement (PMC4058110)

## SUPPLEMENTARY FIGURE LEGENDS

**Fig. S1. Norepinephrine does not affect mitochondrial mass content and cell death on cultured rat cardiomyocytes but decreases the respiratory control ratio.** (A) Mitochondrial heat shock protein 70 (mtHsp70) levels were determined by Western blot, n=6 and (B) Mitochondrial mass by determined by flow cytometry and Mitotraker Green relative fluorescence in cultured rat cardiomyocytes stimulated with NE for 48 h (n = 6), ns=non-significant. (C) Cell death was measured by flow cytometry using propidium iodide in cardiomyocytes treated with NE for 48 h (n = 3). Hydrogen peroxide (1 mM) was used as positive controls. Representative flow cytometry histograms for cell population distribution on each condition are shown in top region of graphic. (D) Respiratory control ratio (CCCP-uncoupled respiration/ basal respiration) was calculated in cardiomyocytes treated with NE for 0, 24 and 48 h (n= 4). \* $p < 0.05$  vs control; ns=non-significant.

**Fig. S2. Dominant negative mutant of Drp1 (K38A) promotes mitochondrial fusion in cultured cardiomyocytes.** Mitochondrial morphology was assessed by confocal microscopy of Mitotracker green stained cells. (A) Representative confocal images of cardiomyocytes transduced with adenovirus containing LacZ or K38A (n = 4), and (B) mitochondrial volume analysis of these cells. (C-D) Western blot and quantification of Drp1 levels of cells transduced with the above-mentioned adenovirus (n = 4). \* $p < 0.05$  vs control; # $p < 0.05$  vs LacZ.

**Fig. S3. Adenovirus containing anti-sense RNA for Mitofusin-2 (AsMfn2) promotes**

**mitochondrial fission in cultured cardiomyocytes.** (A) Representative images of cardiomyocytes transduced with adenovirus containing LacZ or AsMfn2 (n=4) and (B) mitochondrial volume quantification of these cells. Scale bar = 10  $\mu\text{m}$ . (C-D) Western blot and quantification of Mfn2 protein levels of cells transduced with the above mentioned adenovirus. \* $p < 0.05$  vs control; # $p < 0.05$  vs LacZ.

**Fig. S4. Expression of inhibitory peptide (CAIN) and a constitutively active form of calcineurin (CN) promotes changes in levels of RCAN 1.4 in cardiomyocytes and AsMfn2 increases parkin mitochondrial localization and does not stimulate synergistic effects with NE or the ATP synthase inhibitor oligomycin.** Representative Western blot of RCAN 1.4 protein in cardiomyocytes control or stimulated with NE (10  $\mu\text{M}$ ) for 48h and transduced with adenovirus containing LacZ or (A) CAIN and (B) adenovirus containing constitutively active form of CN. (C) Immunofluorescence images of cardiomyocytes treated as indicated, using anti-mtHsp70 (red) or anti-Parkin (green) antibodies. Scale bar=20  $\mu\text{m}$ . (D) Top and bottom graphs show Manders' coefficient and Pearson's coefficients, respectively. Determination of cell area in cardiomyocytes treated with (E) an adenovirus encoding an antisense RNA for Mfn2 (AsMfn2) and then treated the cells with NE or (F) treated with the ATP synthase inhibitor oligomycin (0.2 – 2  $\mu\text{M}$ ) for 48 h. n = 3; \* $p < 0.05$  vs control.

**Figure S1.**

**A**

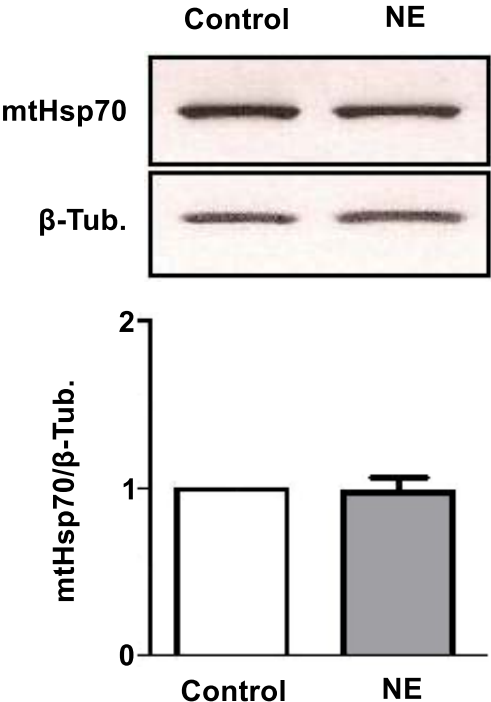

**B**

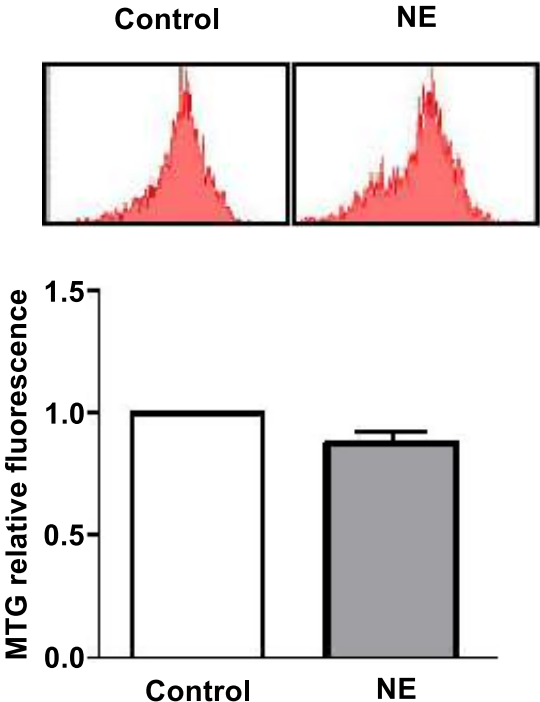

**C**

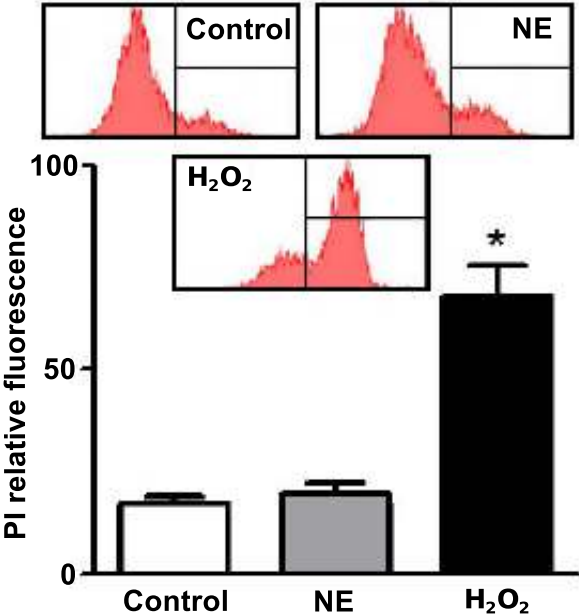

**D**

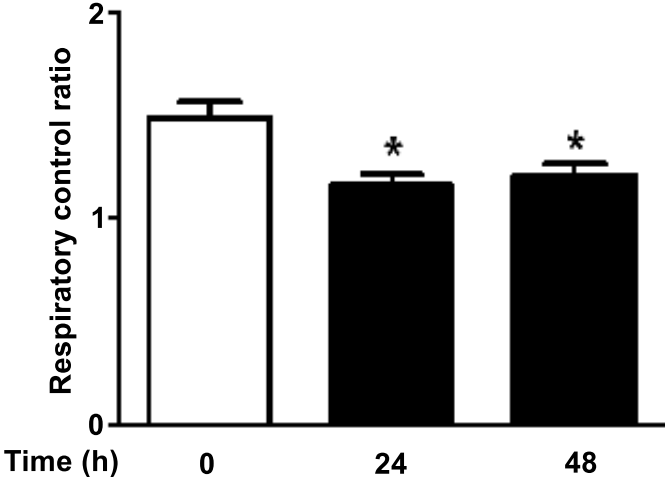

# Figure S2.

## A

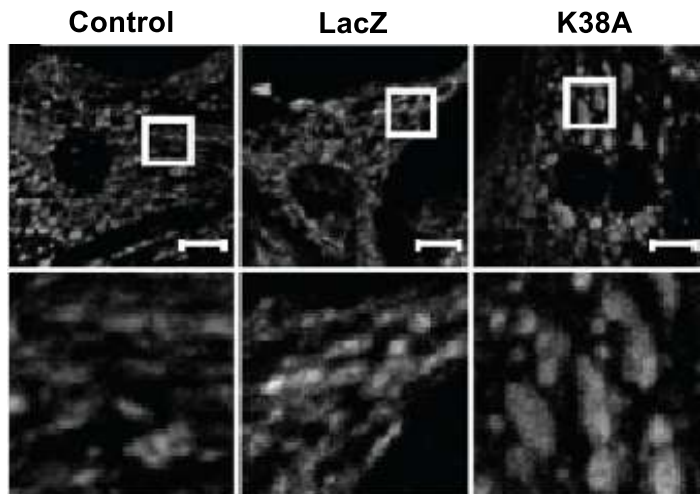

## B

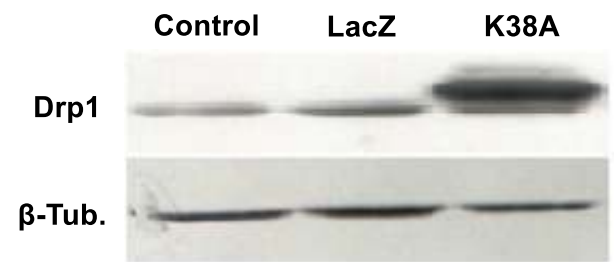

## C

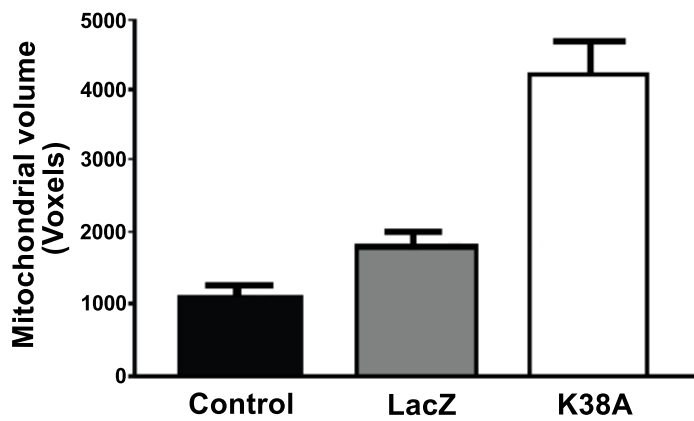

## D

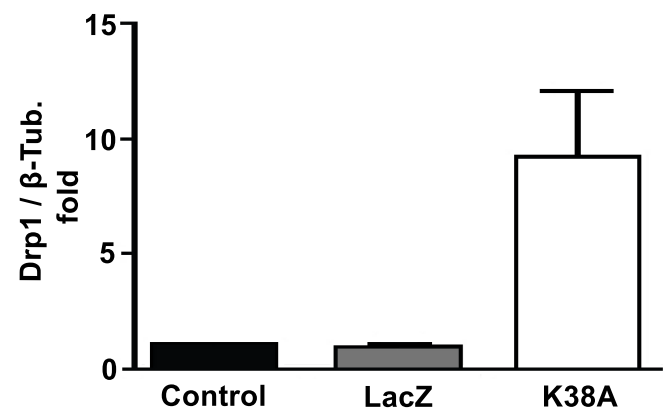

**Figure S3.**

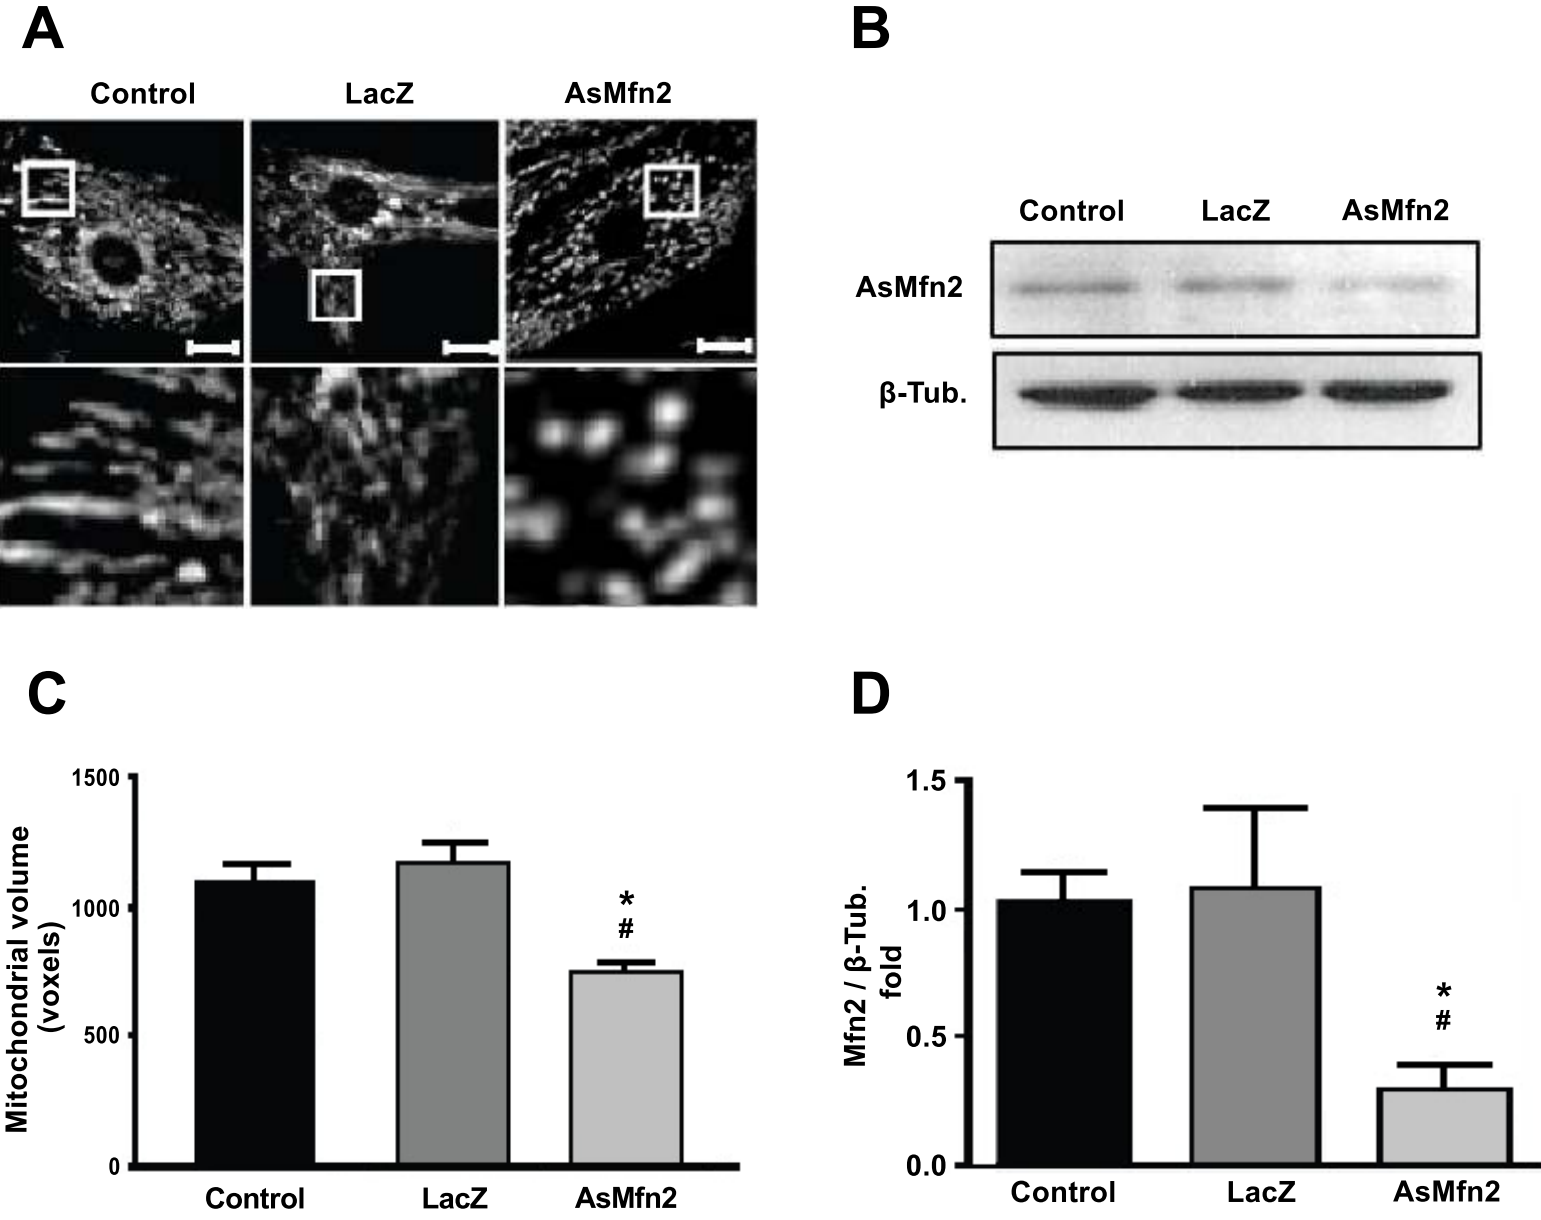

# Figure S4.

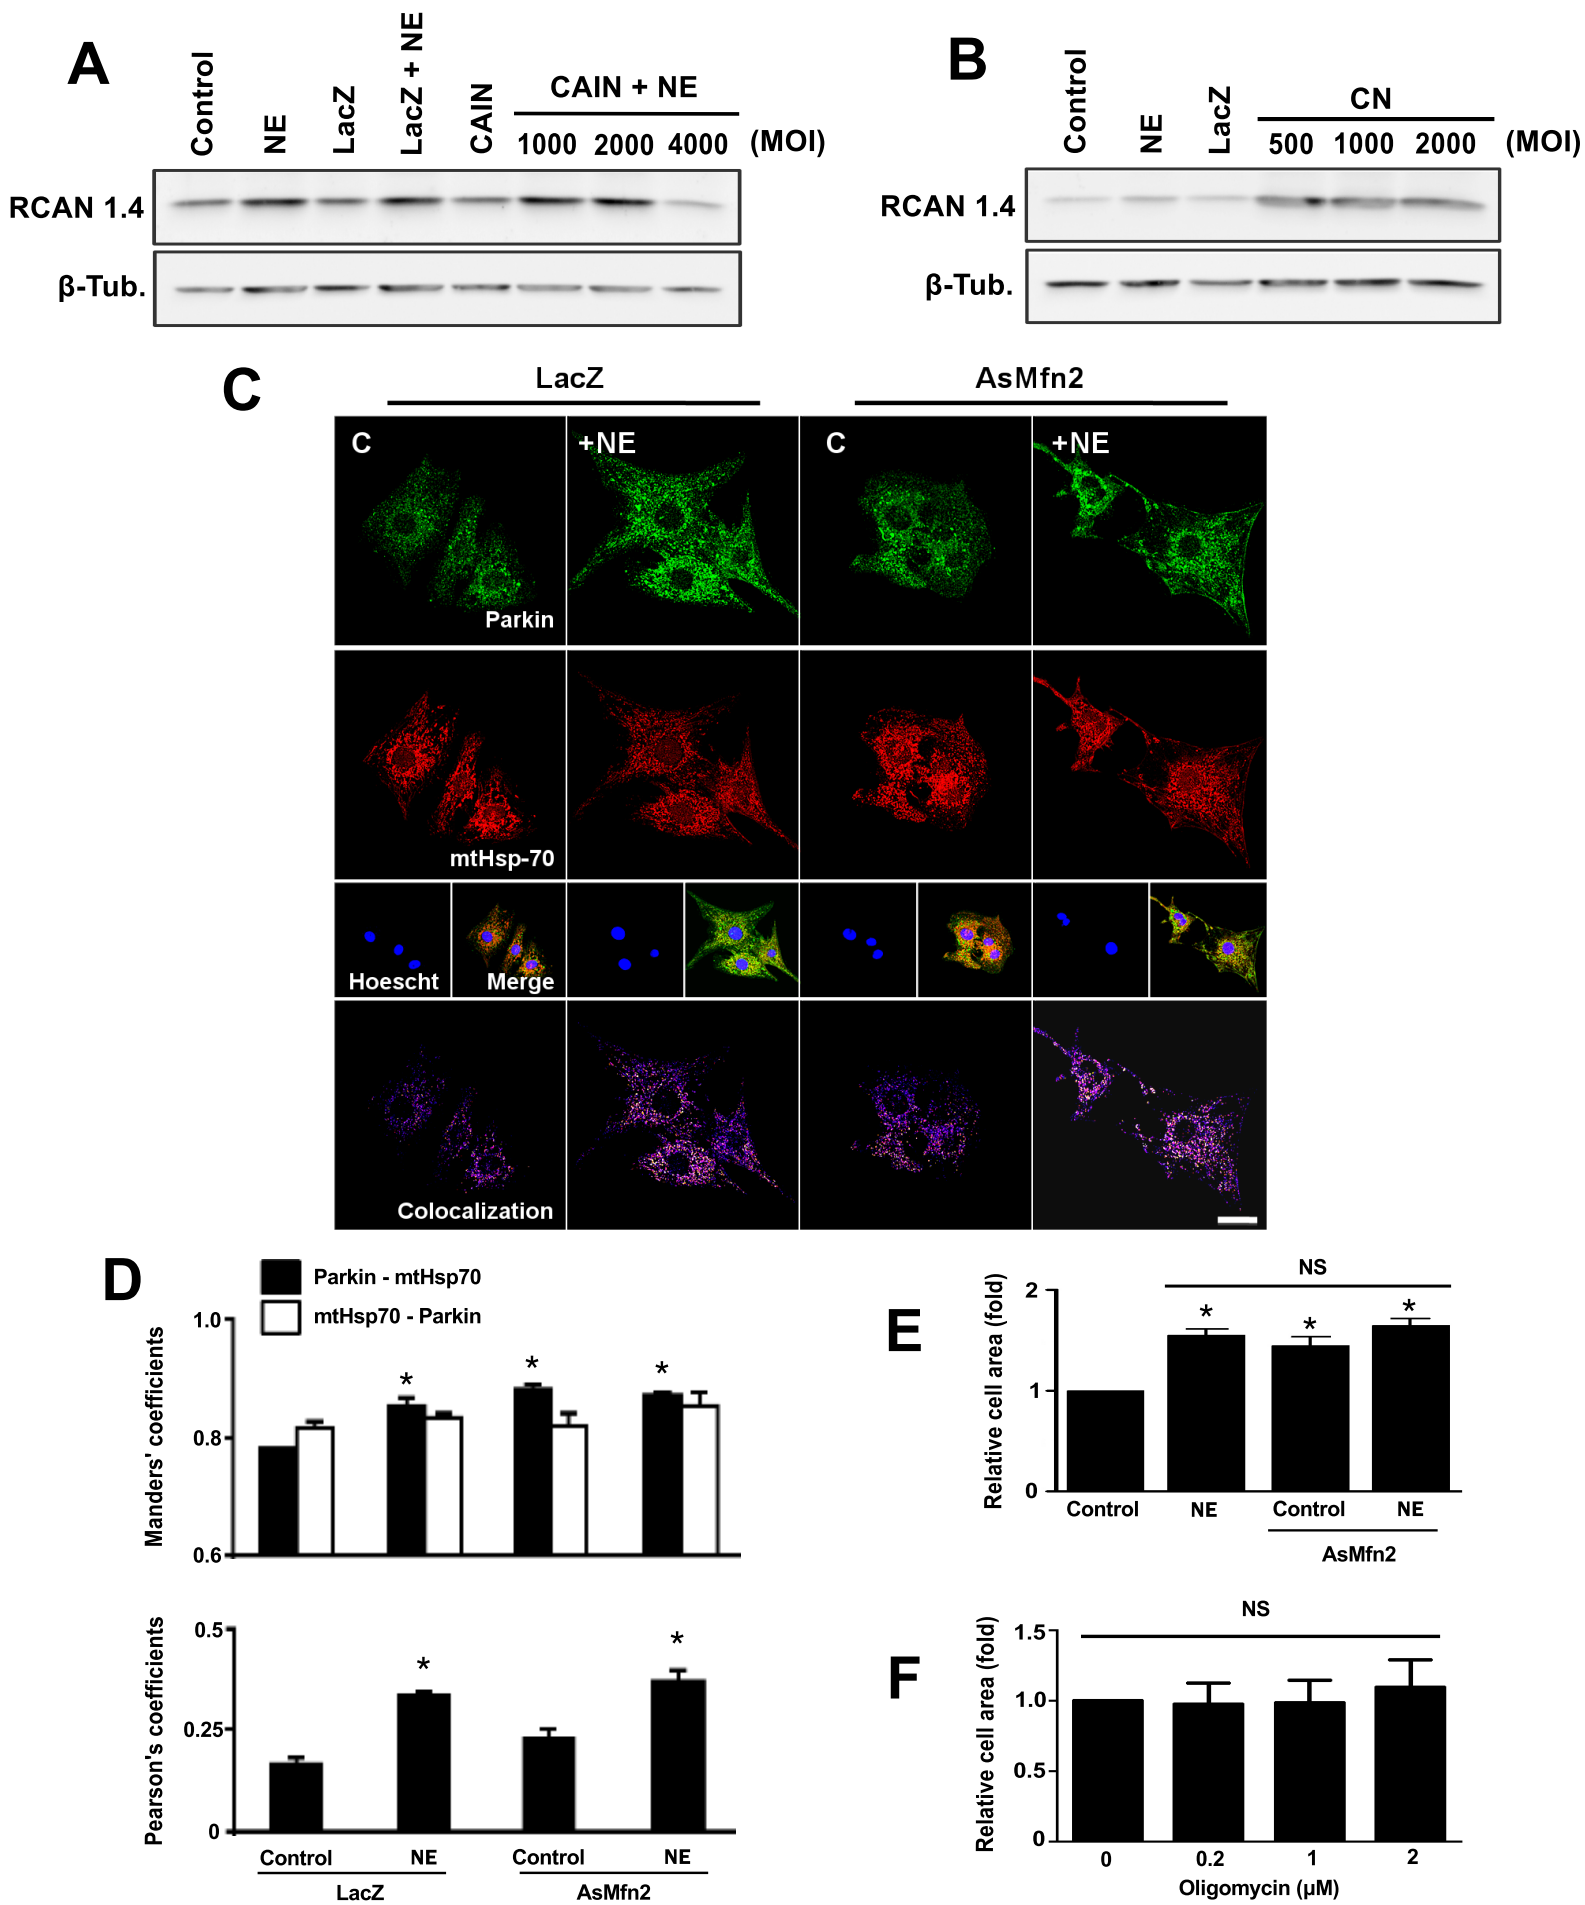

Supplement: supp_127.12.2659_JCS139394.pdf [file supp_127.12.2659_JCS139394.pdf]
